# Supplementary material for: A green approach for the synthesis of bis (substituted sulfabenzamide) para-benzoquinone based on the reaction of sulfabenzamide with electrochemically generated para-benzoquinone and its antibacterial evaluation
Source: Royal Society of Chemistry journal article supplement (doi:10.1039/c5nj01314c), 2015-01-01

## Supplementary Material

### A Green Approach for the Synthesis of Bis (Substituted Sulfabenzamide) *para*-Benzoquinone Based on the Reaction of Sulfabenzamide with Electrochemically Generated *para*- Benzoquinone

Sadegh Khazalpour and Davood Nematollahi\*

Faculty of Chemistry, Bu-Ali Sina University, Hamedan, Iran, Zip Code: 65178-38683. E-  
mail: [nemat@basu.ac.ir](mailto:nemat@basu.ac.ir), Fax: +98-811-8257407

#### Table of Contents:

|                                                                 |           |
|-----------------------------------------------------------------|-----------|
| 1. Electroorganic synthesis of 5 .....                          | Page II   |
| 2. IR spectrum of 5 .....                                       | Page III  |
| 3. <sup>1</sup> H NMR spectrum of 5 .....                       | Page IV   |
| 4. Expanded <sup>1</sup> H-NMR spectrum of 5.....               | Page V    |
| 5. <sup>1</sup> H NMR spectrum of 5 with D <sub>2</sub> O ..... | Page VI   |
| 6. <sup>13</sup> C NMR spectrum of 5 .....                      | Page VII  |
| 7. Mass spectrum of 5 .....                                     | Page VIII |

**Electroorganic synthesis of *N,N'*-(4,4'-((3,6-dioxocyclohexa-1,4-diene-1,4-diyl)bis(azanediyl))bis(4,1-phenylenesulfonyl))dibenzamide (5) (C<sub>32</sub>H<sub>24</sub>N<sub>4</sub>O<sub>8</sub>S<sub>2</sub>).**

A mixture of phosphate buffer solution ( $c = 0.2$  M,  $\text{pH} = 8.0$ )/ethanol mixture (50/50, v/v) containing hydroquinone (0.25 mmol) and sulfabenzamide (0.5 mmol) was subjected to electrolysis in a divided cell at 0.20 V versus Ag/AgCl. The electrolysis was terminated when the current decayed to 5% of its original value. At the end of electrolysis the precipitated solid was collected by filtration and was washed with *n*-hexane. The precipitated solid was recrystallized from methanol to give the compound **5** (isolated yield, 74%) as an orange solid, m.p: 184-185 °C. <sup>1</sup>H NMR (300 MHz, DMSO-*d*<sub>6</sub>)  $\delta$ /ppm: 6.14 (br, 2H, NH, D<sub>2</sub>O exchangeable), 6.61 (d,  $J = 8.7$  Hz, 4H, aromatic), 6.86 (s, 2H, quinone), 7.46 (t,  $J = 7.6$  Hz, 4H, aromatic), 7.60 (m, 6H, aromatic), 7.83 (d,  $J = 7.7$  Hz, 4H, aromatic), 12.0 (br, ~2H, NH, D<sub>2</sub>O exchangeable). <sup>13</sup>C NMR (75 MHz, DMSO-*d*<sub>6</sub>)  $\delta$ /ppm: 112.2, 123.7, 128.2, 128.5, 130.1, 131.9, 132.9, 136.6, 153.7, 165, 187.7 (C=O). IR (KBr)  $\nu$ /cm<sup>-1</sup>: 3459 (NH), 3357 (NH), 3243 (NH), 1678 (C=O), 1628, 1650, 1592, 1500, 1455, 1434, 1321, 1258, 1161, 1086, 876, 837, 786, 718, 683, 568, 548. MS (EI, 70 eV);  $m/z$  (relative intensity): 658 (M + 2H) (3), 505 (22), 503 (23), 428 (100), 426 (100), 347 (14), 276 (94).

## IR spectrum of 5

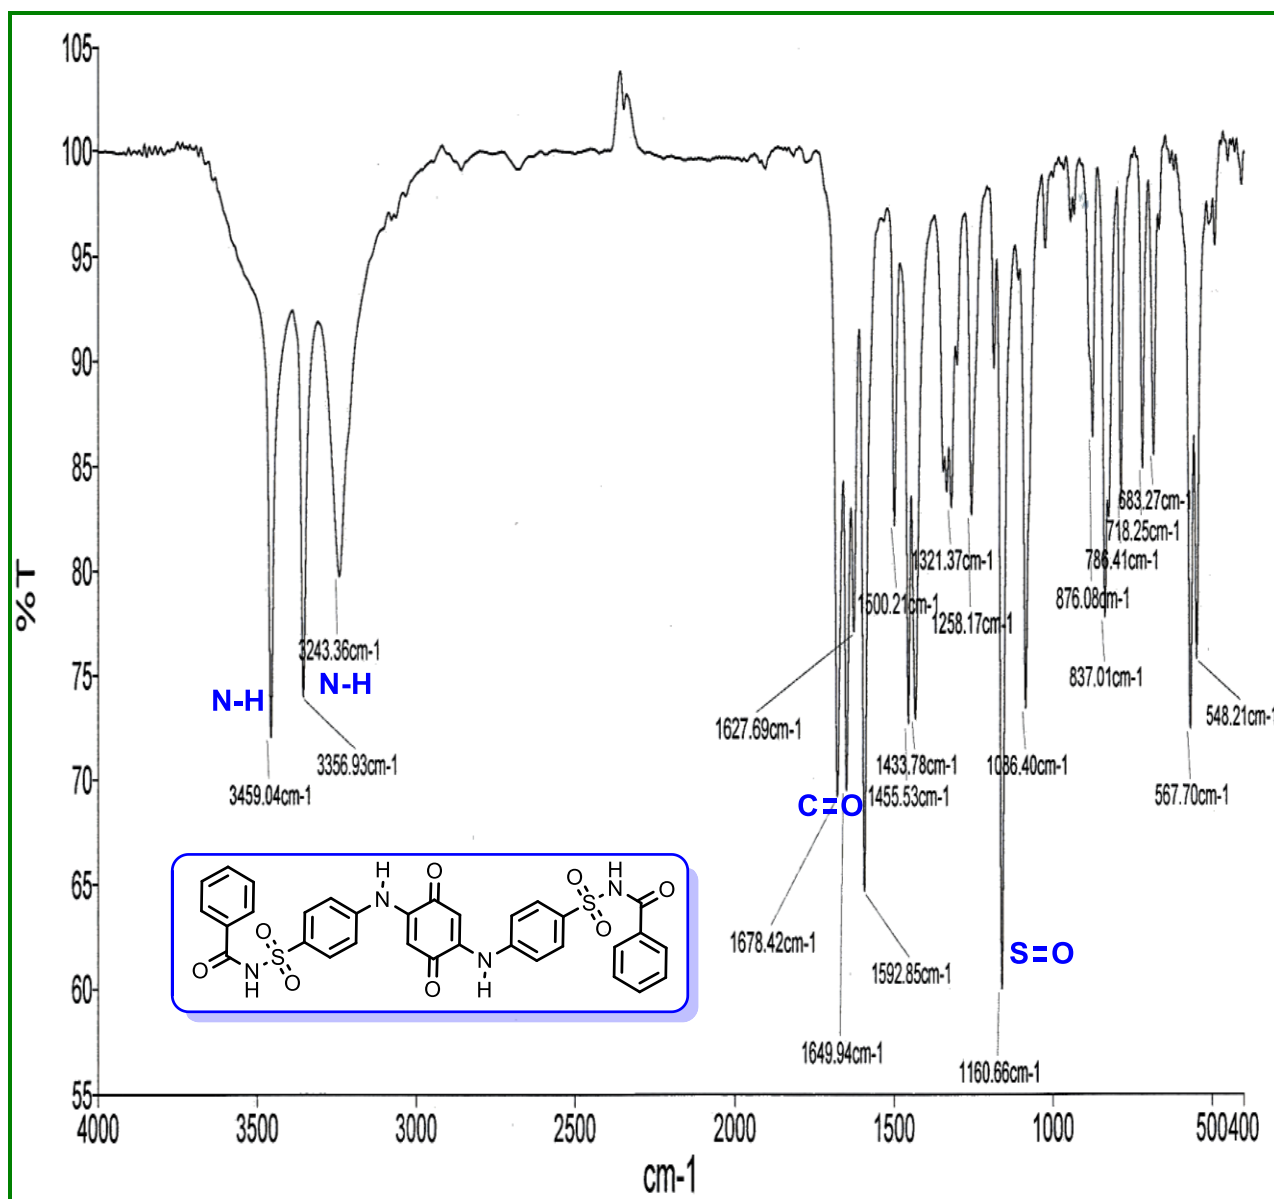

# <sup>1</sup>H NMR spectrum of 5

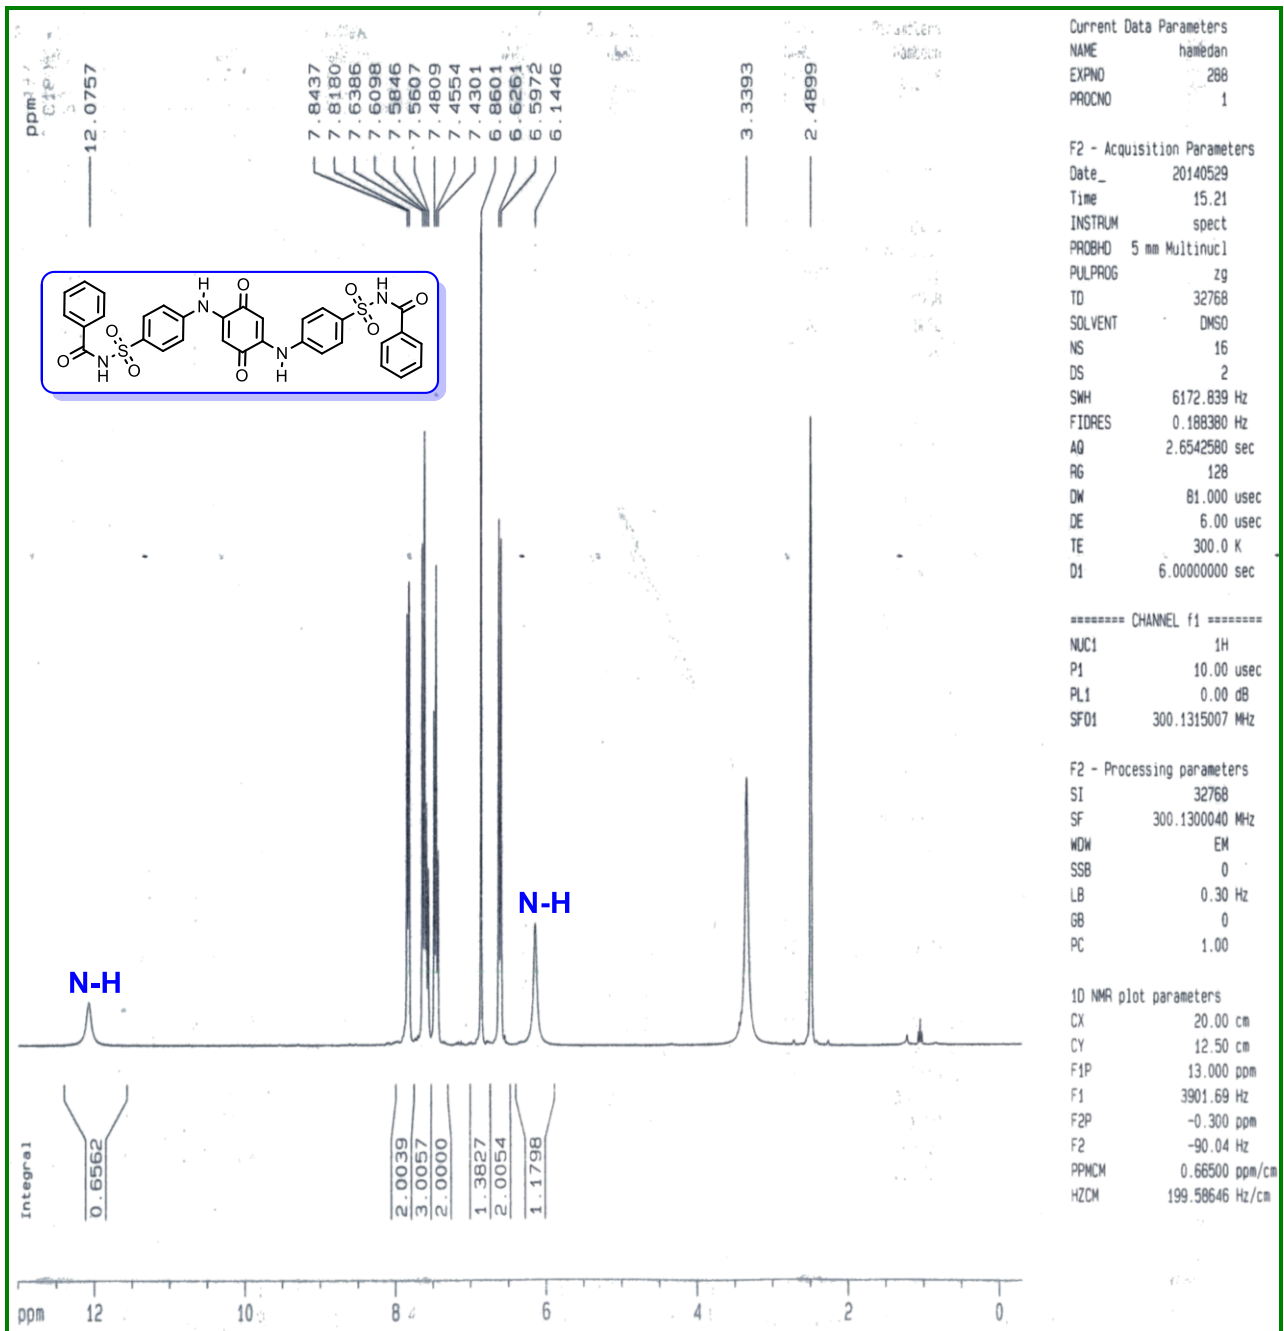

# Expanded <sup>1</sup>H-NMR spectrum of 5

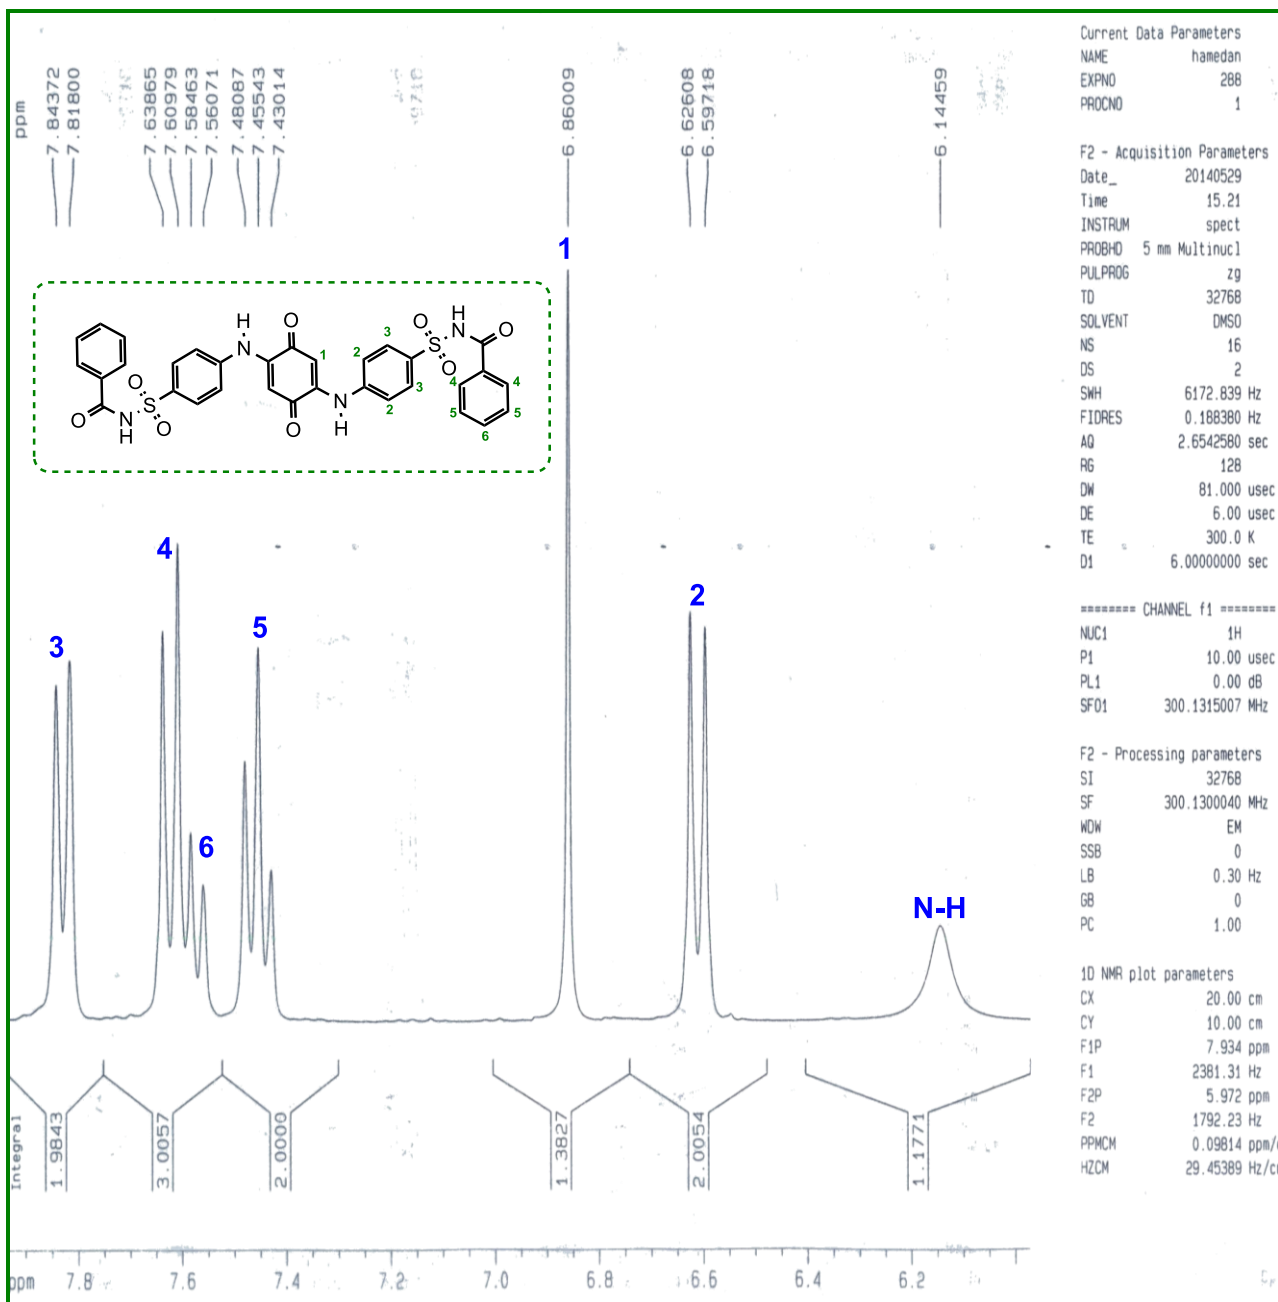

# <sup>1</sup>H NMR spectrum of 5 with D<sub>2</sub>O

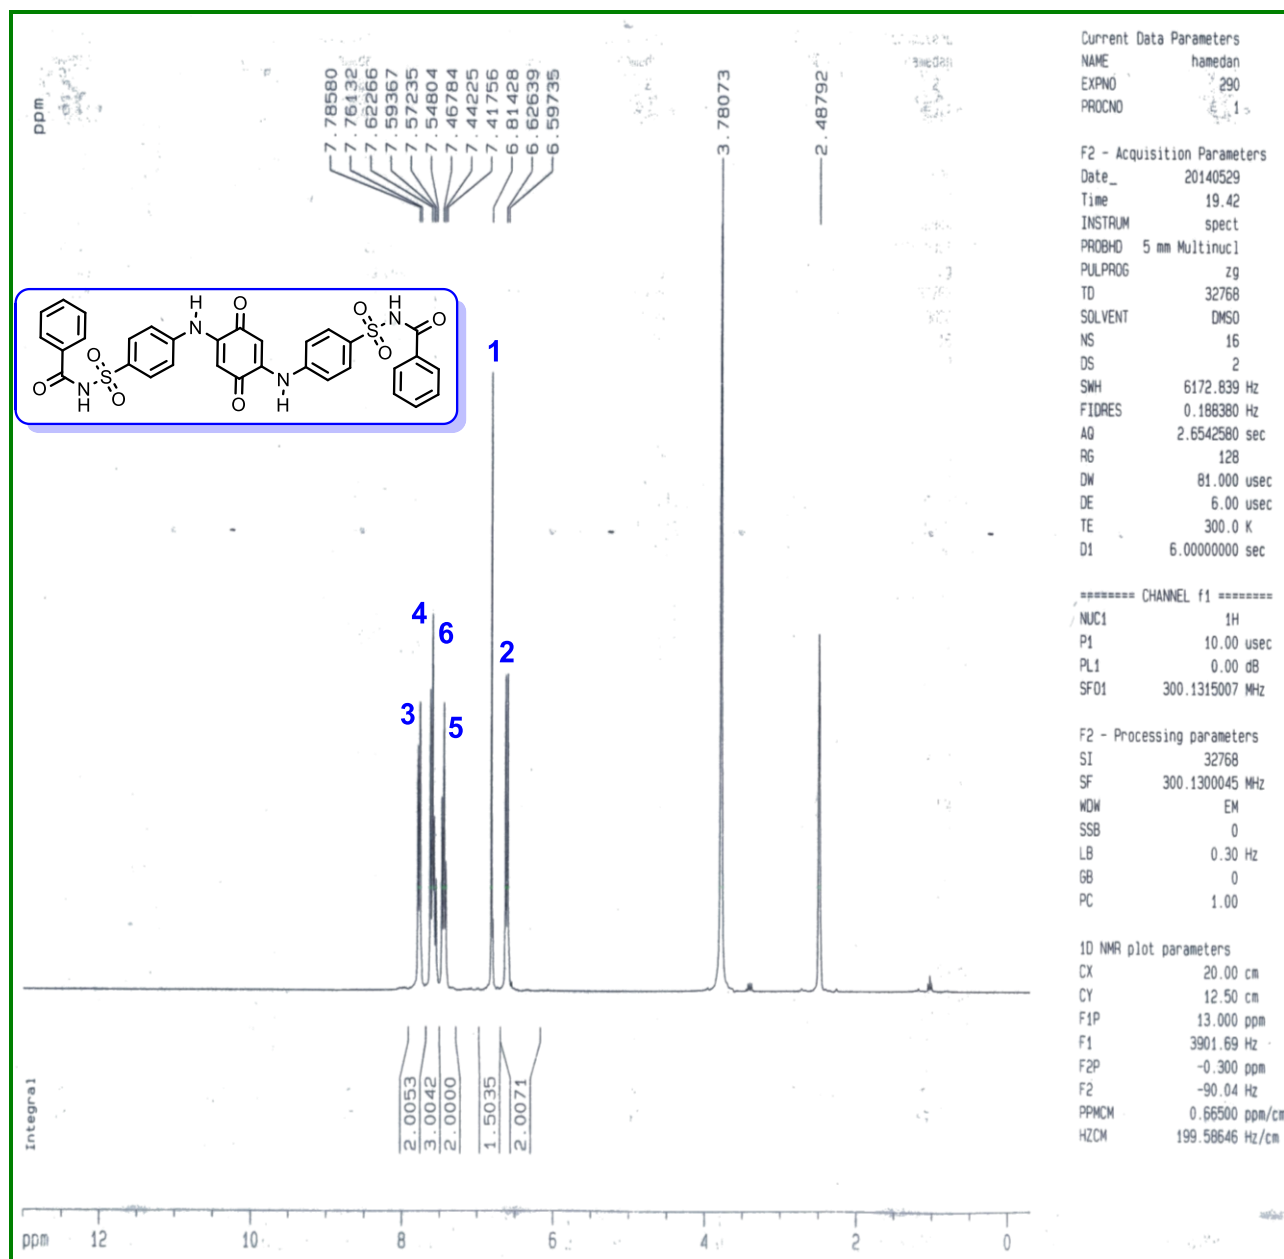

# <sup>13</sup>CNMR spectrum of 5

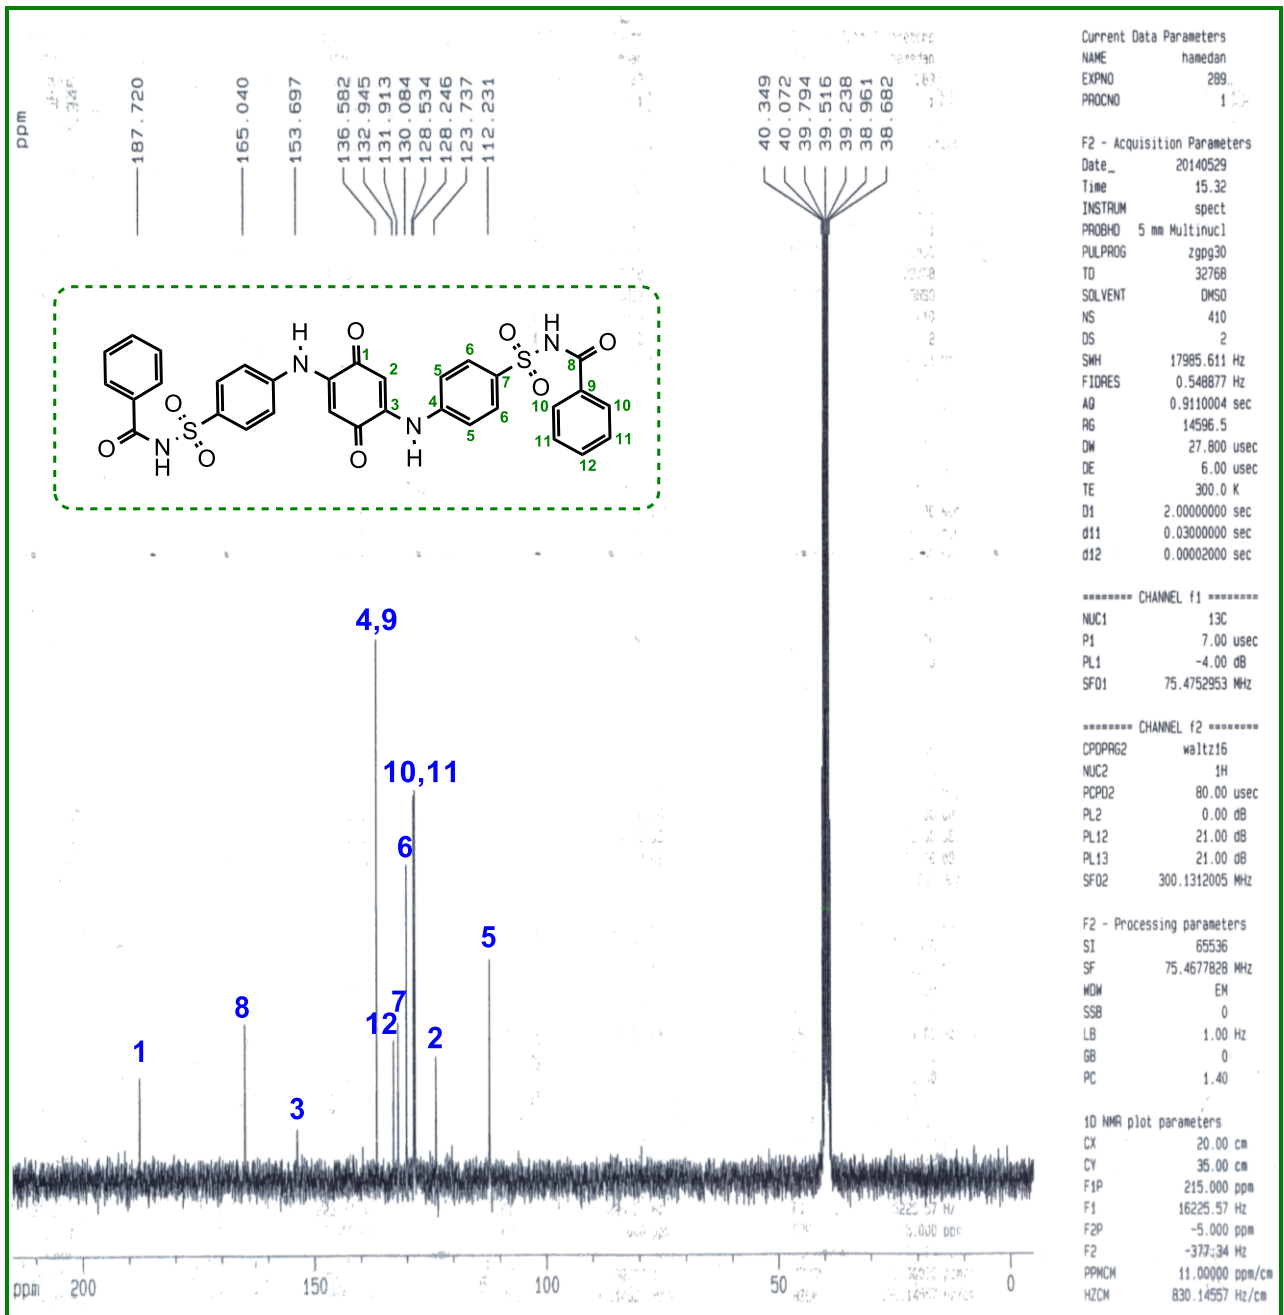

## Mass spectrum of 5

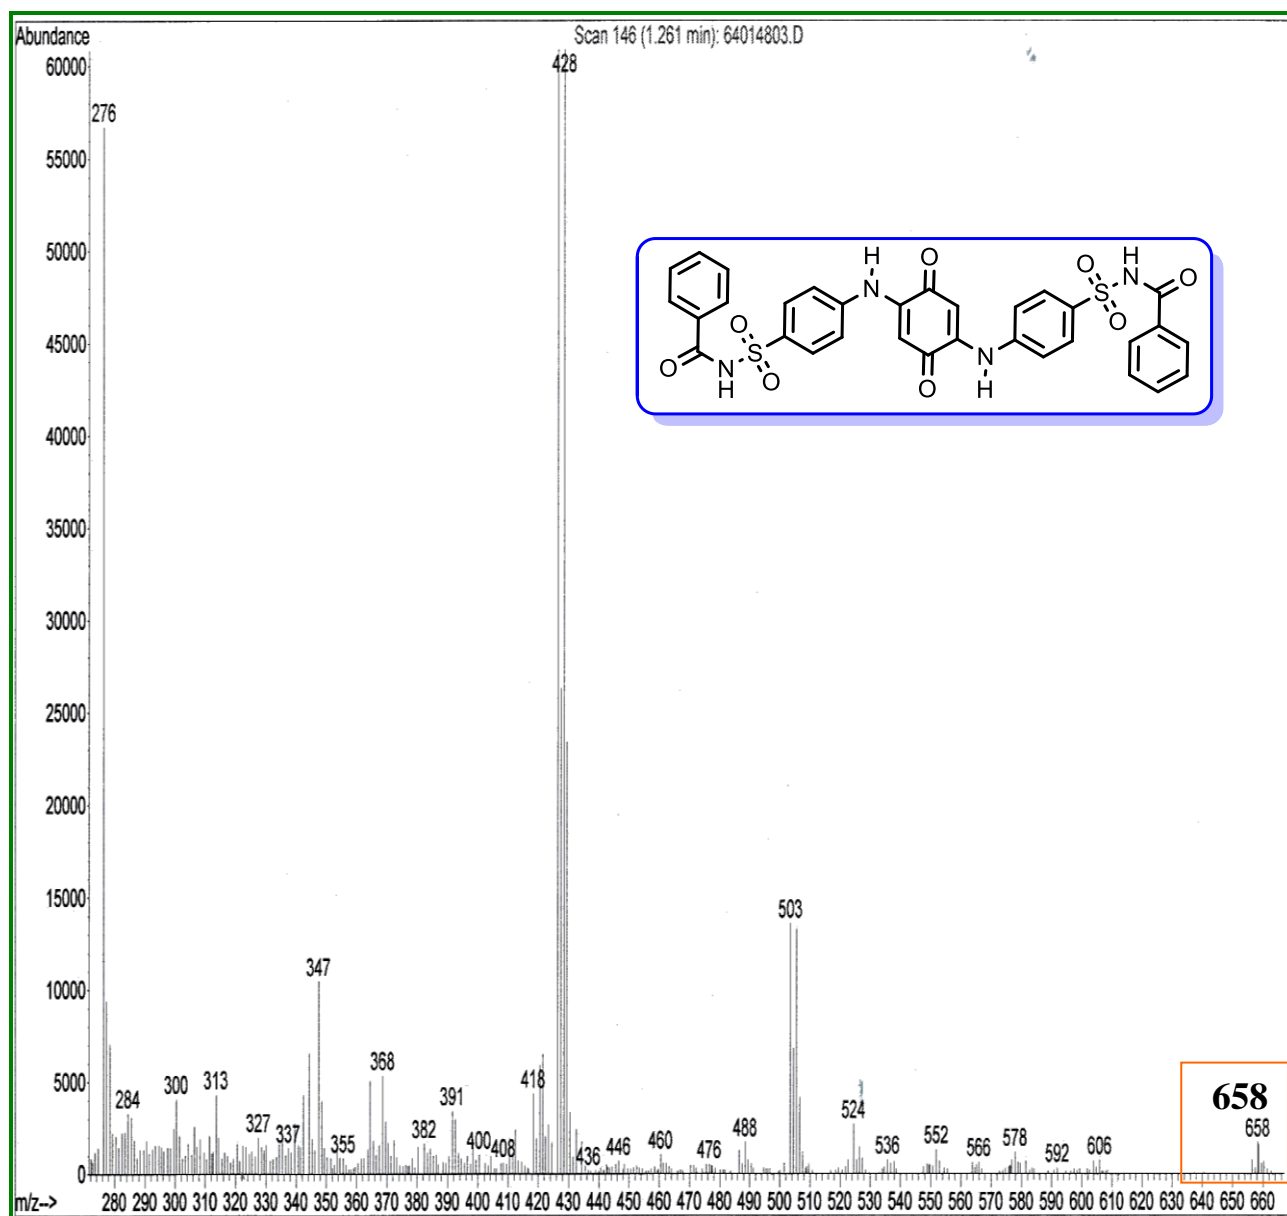

Supplement: c5nj01314c1.pdf [file c5nj01314c1.pdf]
